# Supplementary material for: Performance and Accuracy of the Shifted Laser Surface Texturing Method
Source: MDPI journal article supplement (doi:10.3390/mi11050520), 2020-05-20
Supplement: s1 [file s1]

Supplemental Materials

## Performance and Accuracy of the Shifted Laser Surface Texturing Method

Jiří Martan \*, Denys Moskal, Ladislav Smeták and Milan Honner

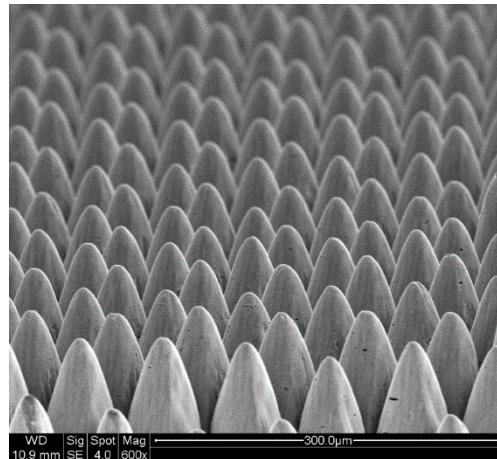

**Figure S1.** SEM image of circular columns produced on tungsten surface by shifted burst method. Laser beam scanning speed was 8 m/s, pulse energy 10  $\mu\text{J}$ , wavelength 532 nm, pulse duration 10 ps, spot size 23  $\mu\text{m}$ , internal laser frequency (intra-burst) 1 MHz. External trigger frequency of the bursts was 112.6 kHz, gate opening time interval  $5.1 \div 8.9 \mu\text{s}$ , distance between raster lines 63  $\mu\text{m}$ , shifting vector length of sLST 10  $\mu\text{m}$ .

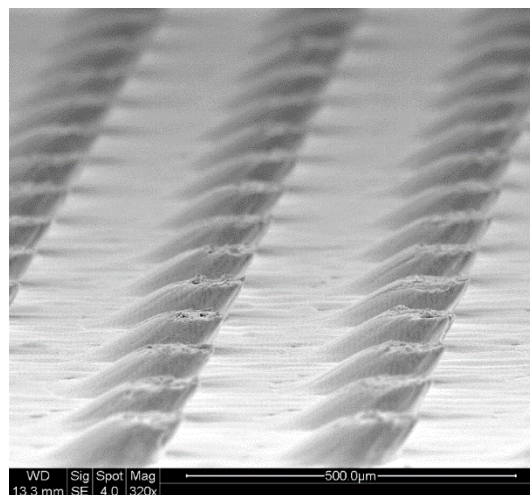

**Figure S2.** SEM image of inclined circular columns produced on tungsten surface by shifted burst method. Laser beam scanning speed was 8 m/s, pulse energy 10  $\mu\text{J}$ , wavelength 532 nm, pulse duration 10 ps, spot size 23  $\mu\text{m}$ , internal laser frequency (intra-burst) 1 MHz. External trigger frequency of the bursts was 68.4 kHz, gate opening time interval  $8.1 \div 14.6 \mu\text{s}$ , distance between raster lines 110  $\mu\text{m}$ , shifting vector length of sLST 10  $\mu\text{m}$ . The surface texturing was applied on sample surface with inclination of 45 degrees.

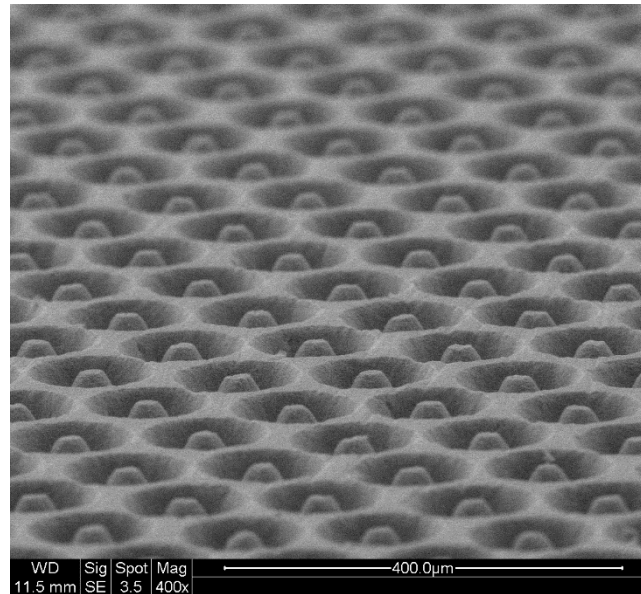

**Figure S3.** SEM image of donut holes produced by shifted path method on  $\text{Al}_2\text{O}_3$  surface. The shifting trajectory was in the form of concentric circles (radiuses 21  $\mu\text{m}$  and 56  $\mu\text{m}$ ). Laser beam scanning speed was 3 m/s, pulse energy 40  $\mu\text{J}$ , wavelength 532 nm, pulse duration 10 ps, spot size 23  $\mu\text{m}$ , internal laser frequency 303 kHz. External trigger frequency in the shifted path method was 20 kHz, gate opening time interval 6.4  $\mu\text{s}$ , distance between raster lines 120  $\mu\text{m}$ , shifting vector length of sLST 5  $\mu\text{m}$ .

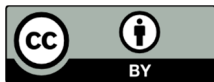

© 2020 by the authors. Licensee MDPI, Basel, Switzerland. This article is an open access article distributed under the terms and conditions of the Creative Commons Attribution (CC BY) license (<http://creativecommons.org/licenses/by/4.0/>).
